# Supplementary material
Source: PubMed Central journal article supplement (PMC2836323)
Supplement: NIHMS172193-supplement-1_si_001.pdf [file NIHMS172193-supplement-1_si_001.pdf]

# **Paramagnetic, silicon quantum dots for magnetic resonance and two photon imaging of macrophages**

Chuqiao Tu,<sup>†</sup> Xuchu Ma,<sup>†,‡</sup> Periklis Pantazis,<sup>§</sup> Susan M. Kauzlarich,<sup>‡,\*</sup> and Angelique Y. Louie<sup>†,\*</sup>

*<sup>†</sup>Department of Biomedical Engineering, <sup>‡</sup>Department of Chemistry, University of California, Davis, CA 95616, USA. <sup>§</sup>Biological Imaging Center, Beckman Institute, California Institute of Technology, Pasadena, CA 91125, USA.*

E-mail: aylouie@ucdavis.edu; smkauzlarich@ucdavis.edu

## **Supporting Information**

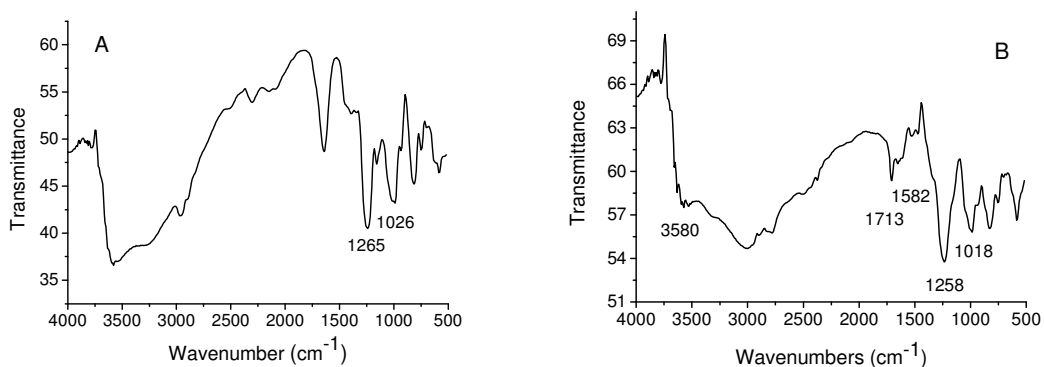

**Supplementary Figure 1.** Infrared spectra of dextran sulfate (A) and dextran sulfate coated manganese doped silicon nanoparticles (B).

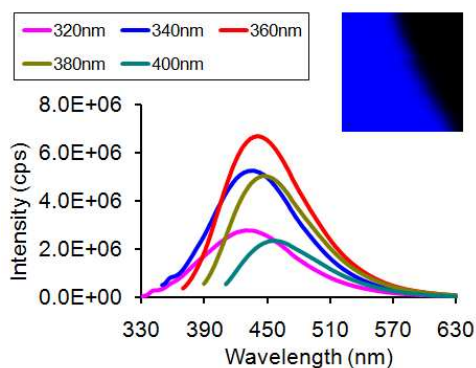

**Supplementary Figure 2.** Single-photon fluorescence spectra of DS Si<sub>Mn</sub> QDs ([Mn<sup>2+</sup>] = 1.72 × 10<sup>-5</sup> M) at different excitation wavelengths in water. Inset: optical imaging of the same quantum dots on Confocal microscopy when excited at 405 nm.

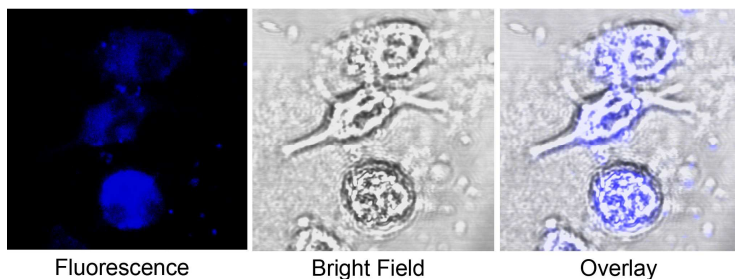

**Supplementary Figure 3.** Confocal imaging of DS Si<sub>Mn</sub> QDs in P388D1 macrophage cells demonstrates that DS Si<sub>Mn</sub> QDs accumulate in vesicles of the cells. ([Mn<sup>2+</sup>] = 2 × 10<sup>-5</sup> M, excitation at 405 nm).
